# Supplementary material for: Disruption of Dhcr7 and Insig1/2 in cholesterol metabolism causes defects in bone formation and homeostasis through primary cilium formation
Source: PubMed Central journal article supplement (PMC6946666; doi:10.1038/s41413-019-0078-3), 2020-01-02

Figure S1

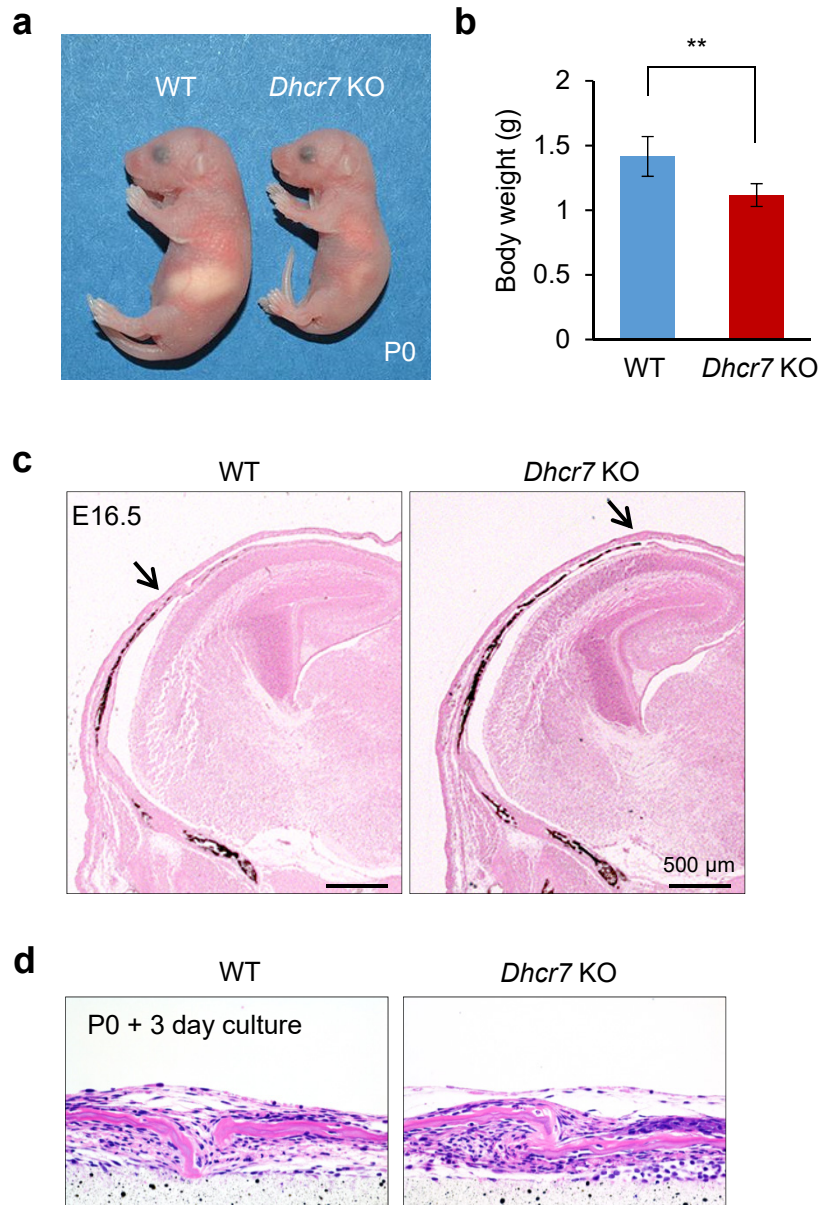

Figure S2

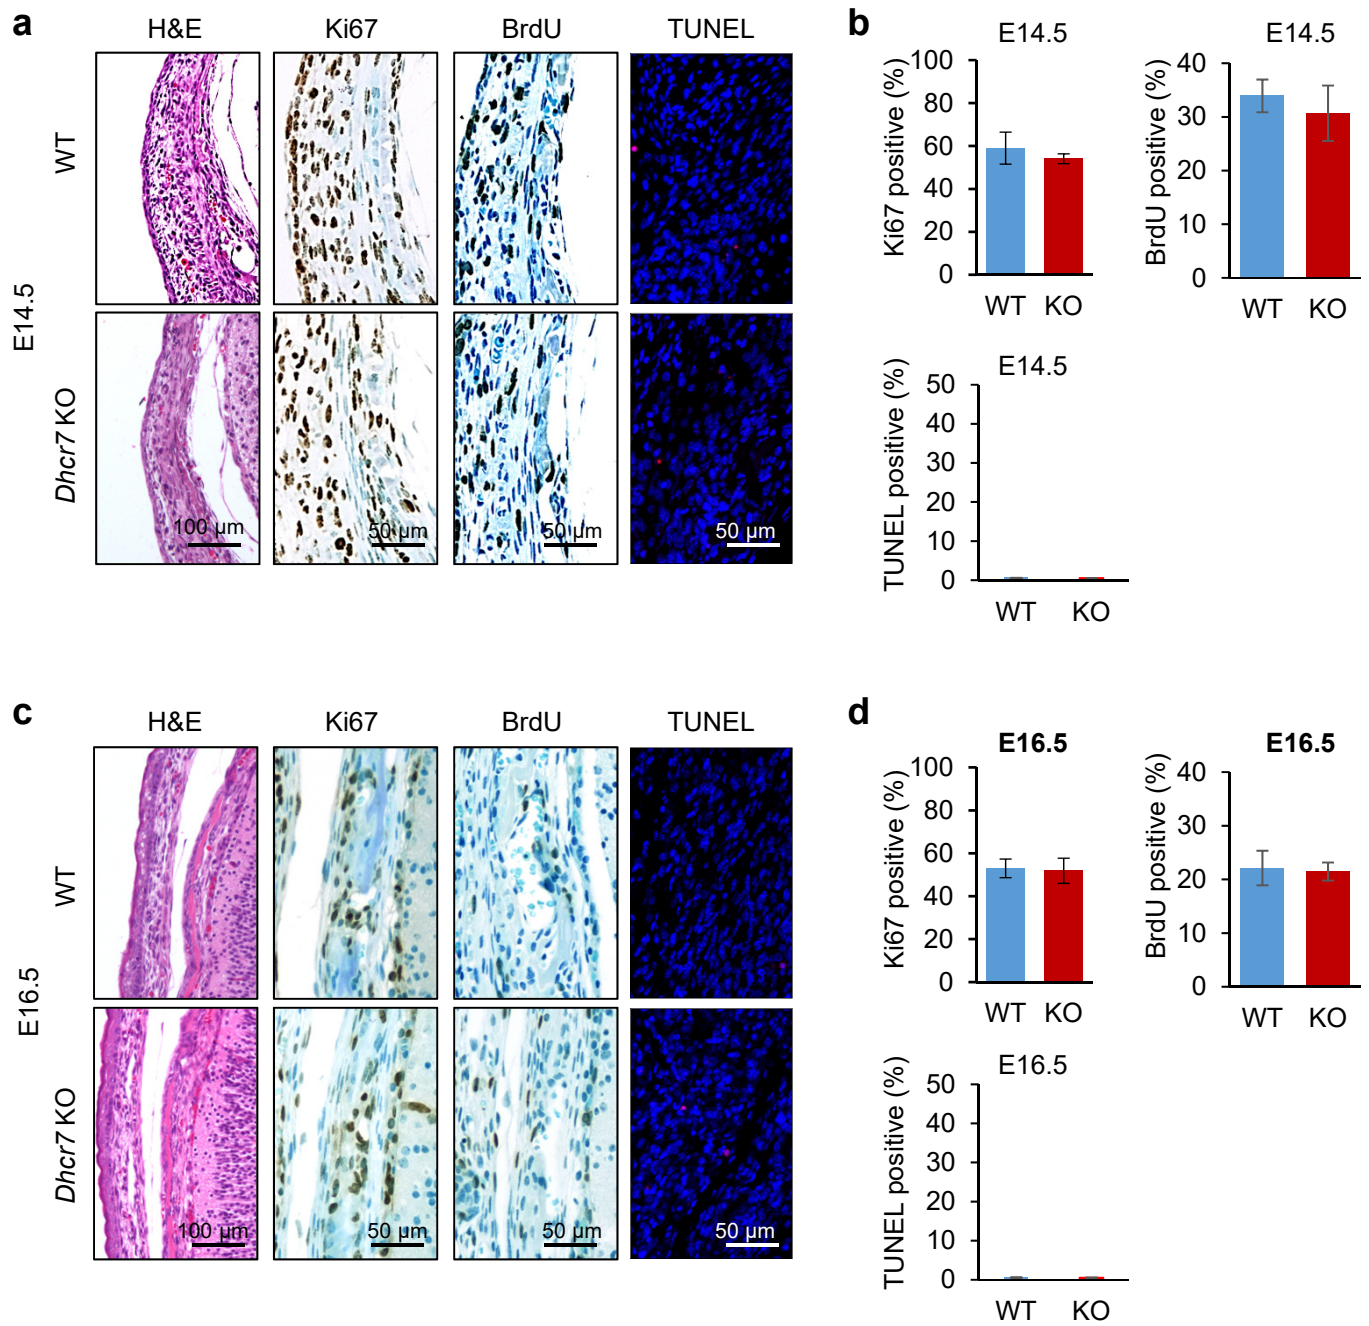

Figure S3

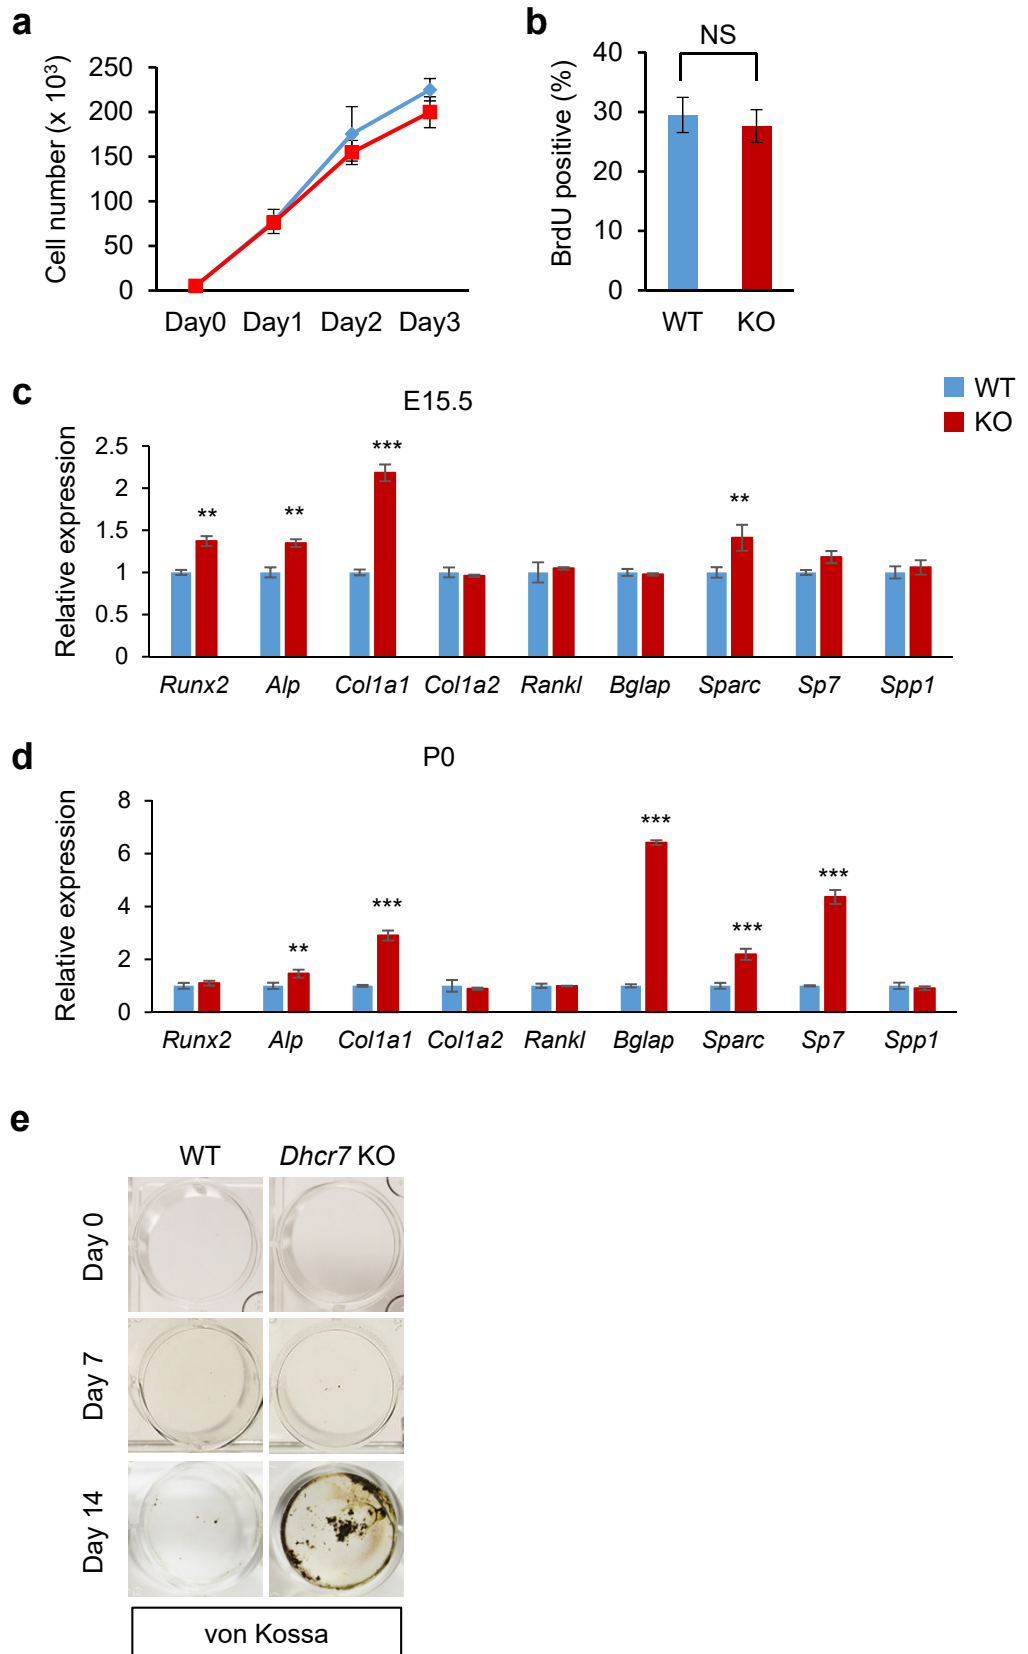

Figure S4

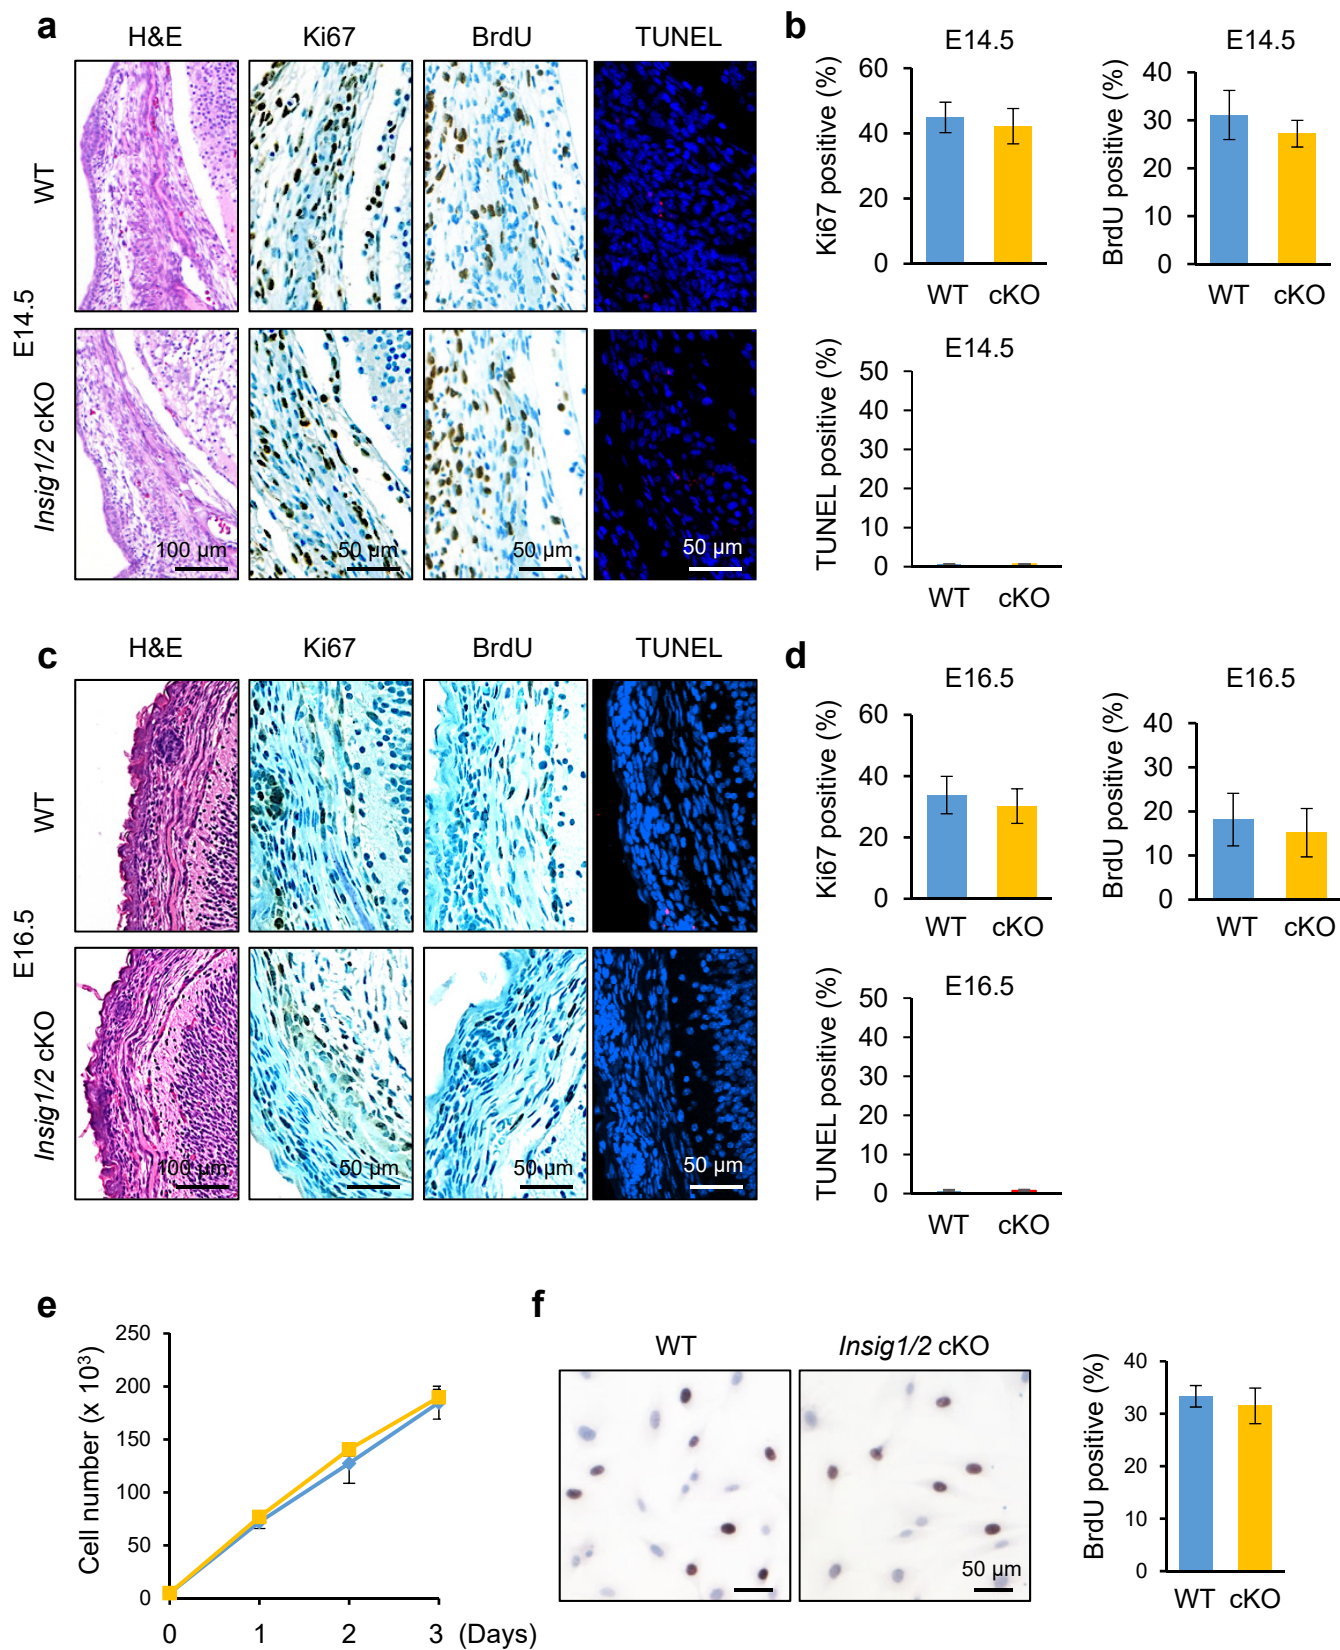

Figure S5

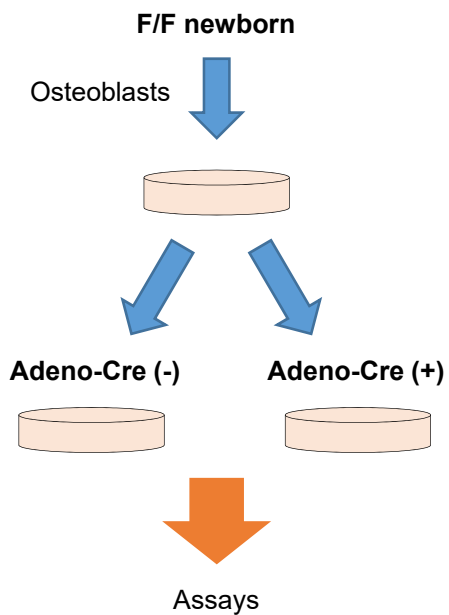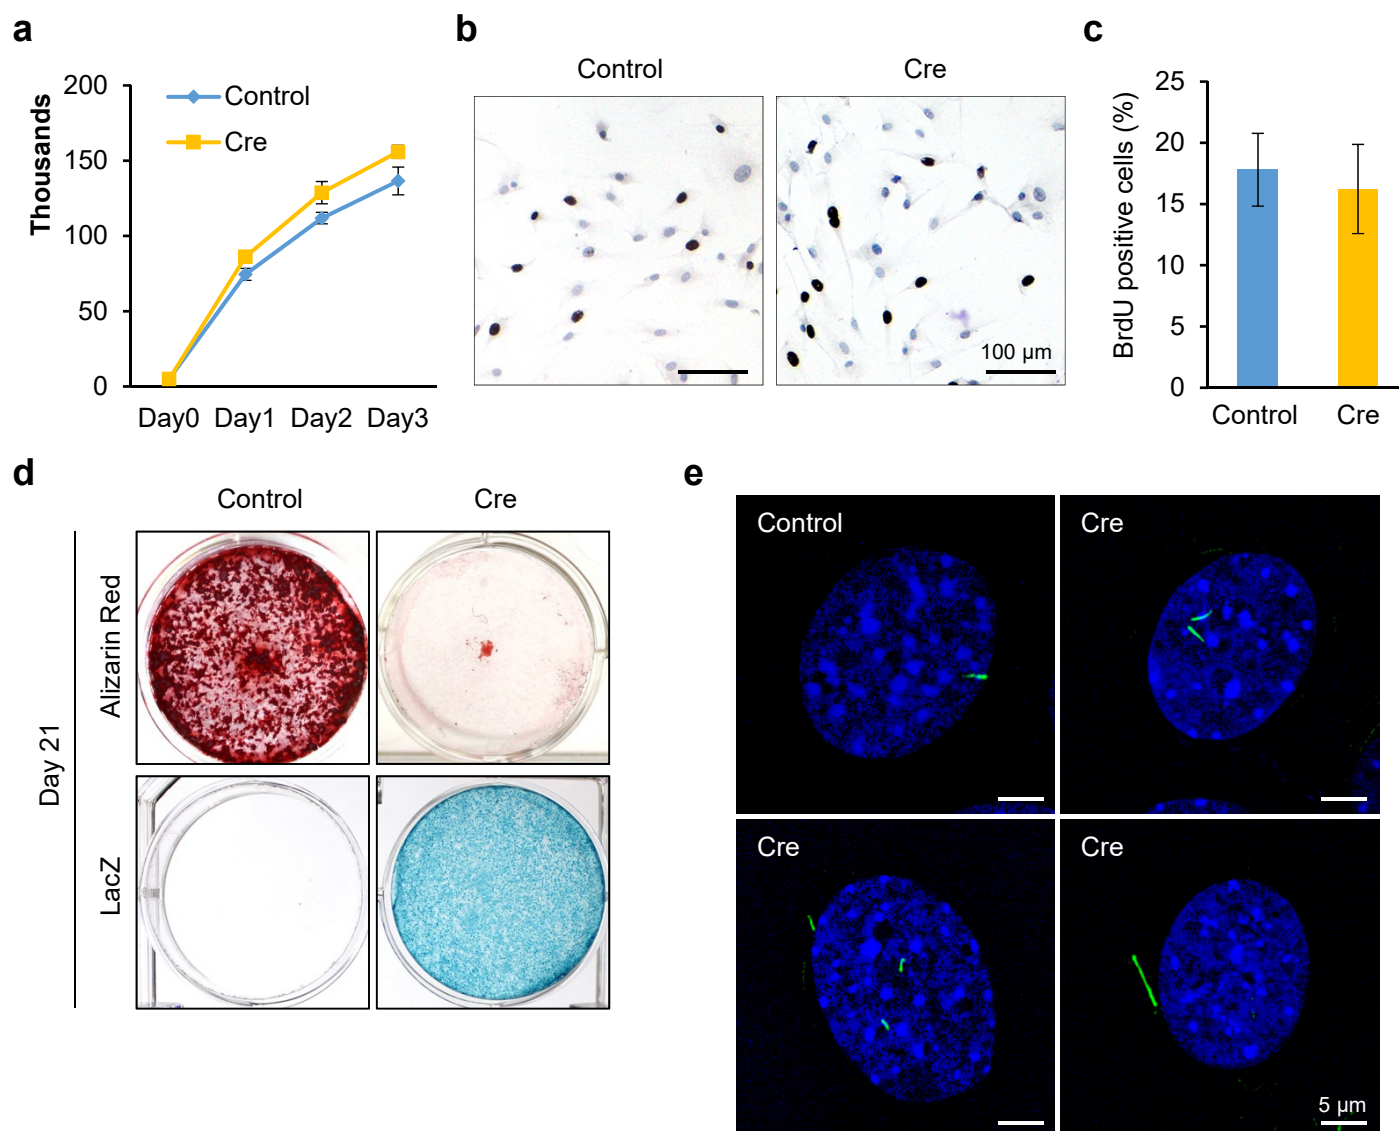

Figure S6

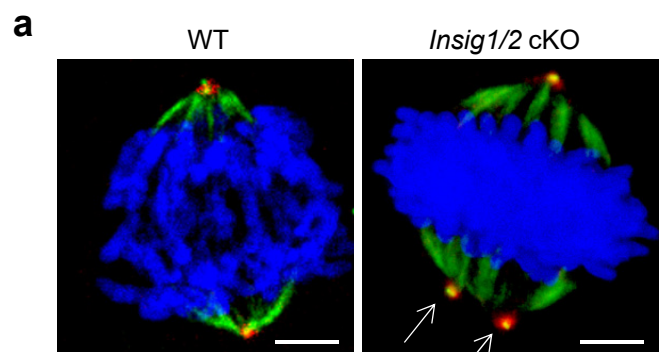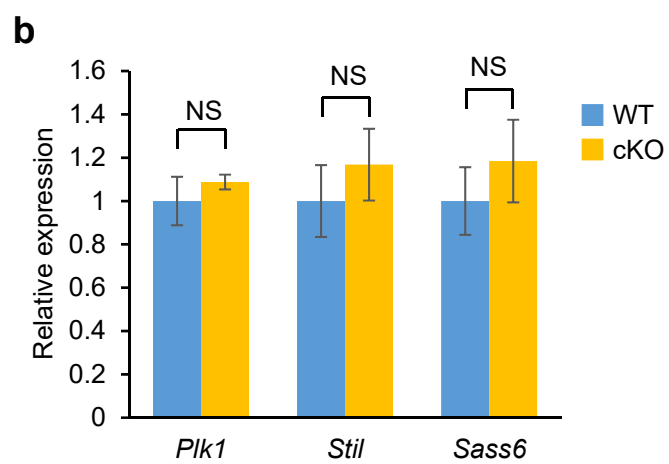

**a**

*Col1a1* GLI – Binding Site (-68 to -60 bp)

|            |                                                                        |
|------------|------------------------------------------------------------------------|
| Mouse      | gacgggagtttctcctcgggacggagcag-gaggcacg--cggagtga <b>ggcca</b> cgcatga  |
| Rat        | gacgggagtttccacctccggacggagcag-gaggcaca--cggagtga <b>ggcca</b> cgcatga |
| Dog        | gacgggagtttctcctcggggtcggagcaggaggcacgcggagtgtgaggccacgcatga           |
| Horse      | gacgggagtttccccctcggggtcggagcaggaggcacgcggagagtgaggccaacgcatga         |
| Macaque    | gacgggagtttctccttggggtcggagcaggaggcacgcggagtgtgaggccaacgcatga          |
| Orangutan  | gacgggagtttctcctcggggtcggagcaggaggcacgcggagtgtgaggccaacgcatga          |
| Human      | gacgggagtttctcctcggggtcggagcaggaggcacgcggagtgtgaggccaacgcatga          |
| Chimpanzee | gacgggagtttctcctcggggtcggagcaggaggcacgcggagtgtgaggccaacgcatga          |
|            | ***** ** * * ***** * *****                                             |

**b**

*Col1a1* LEF1 – Binding Site 1(-29 to -25 bp)

|           |                                                                      |
|-----------|----------------------------------------------------------------------|
| Mus       | gccgaagctaacccccaccccagccg <b>caaa</b> gagtctacatgtctagggcttagacatgt |
| Rattus    | gccgaagctaacccccaccccagccgcaaaagagtctacatgtctagggcttagacatgt         |
| Dog       | gccgacg-ctaacccccaccccagccgcaaaagagtctacatgtctagggcttagacatgt        |
| Equus     | gccgacg-ctaacccccaccccagccgcaaaagagtctacatgtctagggcttagacatgt        |
| Rhesus    | gccggacgctaaccacctccccagccgcaaaagagtctacatgtctagggcttagacatgt        |
| Orangutan | gccggacg-ctaaccacctccccagccgcaaaagagtctacatgtctagggcttagacatgt       |
| Homo      | gccggacg-ctaaccacctccccagccgcaaaagagtctacatgtctagggcttagacatgt       |
| Pan       | gccggacg-ctaaccacctccccagccgcaaaagagtctacatgtctagggcttagacatgt       |
|           | ** * * *****                                                         |

*Col1a1* LEF1 – Binding Site 2 (-484 to -480 bp)

|           |                                                                    |
|-----------|--------------------------------------------------------------------|
| Mus       | caattattcctgacactgatcc <b>ctttg</b> tagtgttcccaactc-----agattctcag |
| Rattus    | caattgtgcctgacactgaacctttgtaagtgttcccaactc-----agattcccaa          |
| Dog       | ggatcaccaccttctcttctacactctggaagattcccttcccagc-----tccccag         |
| Equus     | ccaattacccaatccttccacctttggaaggtccctaccactcccc-----aa              |
| Rhesus    | ccaacaccccccaaccttccacctttggaaggtctccccaccagctc-----ccaag          |
| Orangutan | ccaacaccccccaaccttccacctttggaaggtctccccaccagctc-----ccaag          |
| Homo      | ccaacaccccccaaccttccacctttggaaggtctccccaccagctccccagttccccag       |
| Pan       | ccaacaccccccaaccttccacctttggaaggtctccccaccagctccccagttccccag       |
|           | * ** ** ** * * * * *                                               |

*Col1a1* LEF1 – Binding Site 3 (-1642 to -1638 bp)

|           |                                                                      |
|-----------|----------------------------------------------------------------------|
| Mus       | --ttttcc <b>ctttg</b> ccttcggtgcacaaaactagctcaggaggggcgtgaagg--ggggg |
| Rattus    | tttttttctttgccttcggtgcacaaaactagctcaggaggggcgtgaagg--g--gg           |
| Dog       | ttttttcctttgccttcggtgcacaaaaccagctgggggagggcgtggagaggggcggg          |
| Equus     | ttttttcctttgccttcggtgcacaaaaccagctgggggagggcgtggagaggggcggg          |
| Rhesus    | ttttccccctttgccttcggtgcacaaaaccagctgggggagggcgtggagaggggcggg         |
| Orangutan | ttttccccctttgccttcggtgcacaaaaccagctgggggagggcgtggagaggggcggg         |
| Homo      | ttttccccctttgccttcggtgcacaaaaccagctgggggagggcgtggagaggggcggg         |
| Pan       | ttttccccctttgccttcggtgcacaaaaccagctgggggagggcgtggagaggggcggg         |
|           | ** ***** ** * **                                                     |

*Col1a1* LEF1 – Binding Site 4 (-2713 to -2709 bp)

|           |                                                                    |
|-----------|--------------------------------------------------------------------|
| Mus       | gggg--tggagatt-ctggcttttgcctcctacactccaagtgcctga <b>caaa</b> gccta |
| Rattus    | gggg--tggagatt-ctggcttttgcctcctacactccaagtgcctga <b>caaa</b> gccta |
| Dog       | gtgggggggagattttggctttgtttcccccccaactccaatgccggactaagtctca         |
| Equus     | gg---aggagattttgg--cttttg-ctcccccaactccaatgccggactaagtctca         |
| Rhesus    | gg---aggagattttgg--cttttgctccccctactttaagtgccggactaagtctca         |
| Orangutan | gg---aggagattttgg--cttttgctcccccaactttaagtgccggactaagtctca         |
| Homo      | gg---aggagattttgg--cttttgctcccccaactttaagtgccggactaagtctca         |
| Pan       | gg---aggagattttgg--cttttgctcccccaactttaagtgccggactaagtctca         |
|           | * ***** * * ** ** * * * * * * * * * *                              |

Figure S8

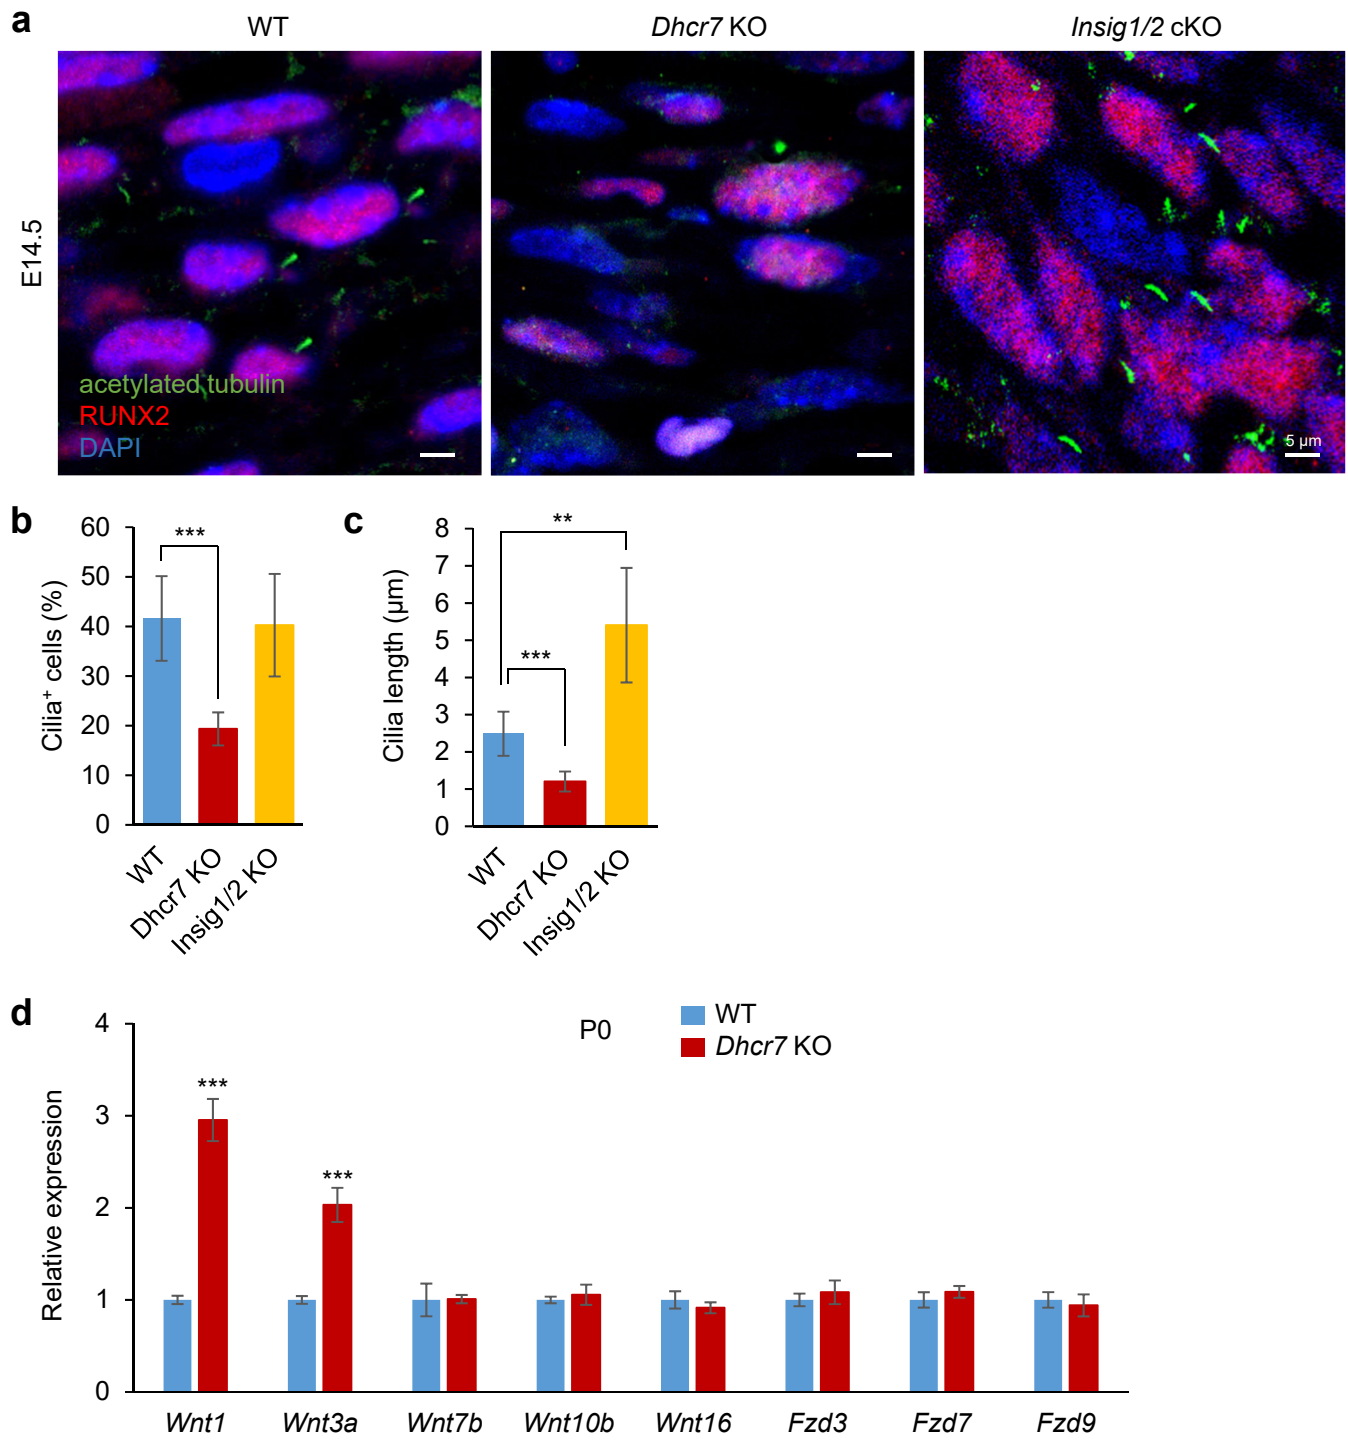



Figure S9

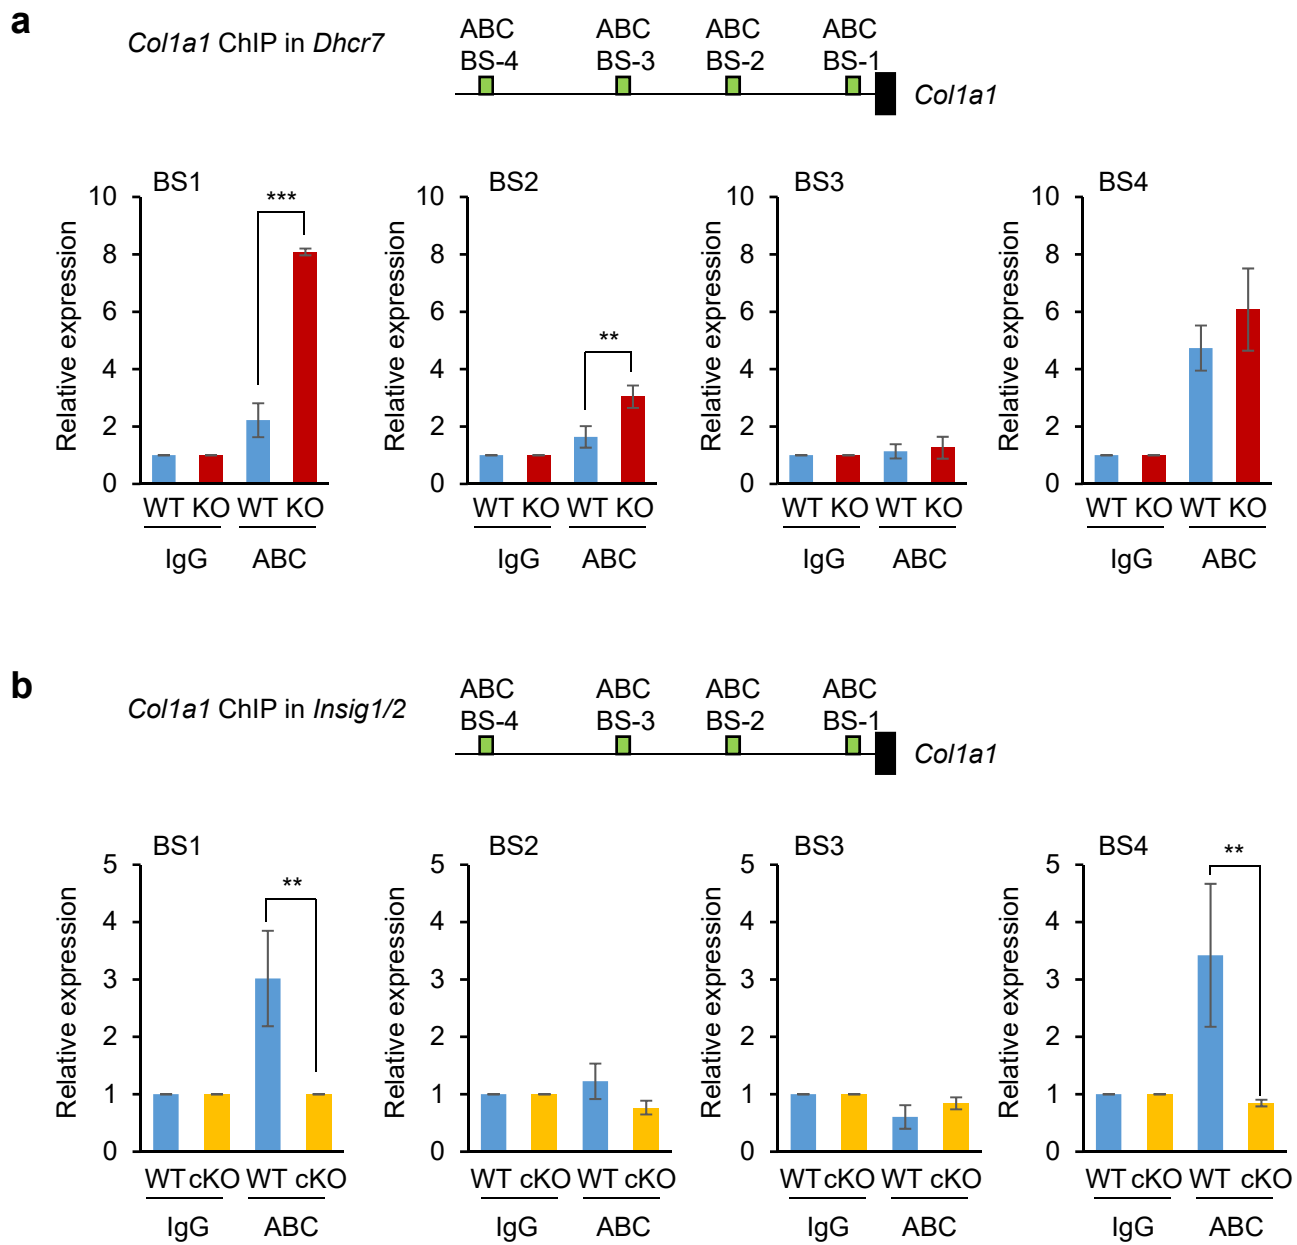

Supplement: 41413_2019_78_MOESM3_ESM.pdf [file 41413_2019_78_MOESM3_ESM.pdf]
